# Supplementary material for: A novel sulfur-impregnated porous carbon matrix as a cathode material for a lithium–sulfur battery
Source: Royal Society of Chemistry journal article supplement (doi:10.1039/c6ra09338h), 2016-01-01
Supplement: c6ra09338h1.pdf [file c6ra09338h1.pdf]

## Supplementary Information

### A novel sulfur-impregnated porous carbon matrix as a cathode material for a lithium sulfur battery

Yanhui Cui,<sup>1</sup> Xiao Liang,<sup>1</sup> Jue Ouyang,<sup>1</sup> Jiayi Huang,<sup>1</sup> Jiong Zeng,<sup>1</sup> Junwei Wu,<sup>1\*</sup>

Zuohua Li,<sup>2\*</sup> Chenqiang Du,<sup>3</sup> Zhoufu Li,<sup>3</sup> Andrew P. Baker,<sup>1</sup> Kevin Huang,<sup>4</sup> Xinhe

Zhang<sup>5</sup>

1 Shenzhen Key Laboratory of Advanced Materials, Department of Materials Science and Engineering, Harbin Institute of Technology Shenzhen Graduate School, Shenzhen, 518055, China

2 School of Civil and Environmental Engineering, Harbin Institute of Technology Shenzhen Graduate School, Shenzhen 518055, China

3 Department of Applied Chemistry, School of Chemical and Engineering, Tianjin University, Tianjin, 300072, China

4 Department of Mechanical Engineering, University of South Carolina, Columbia, SC 29201, USA

5 Dongguan Mcnair Technology Co., LTD, Dongguan, 523800, China

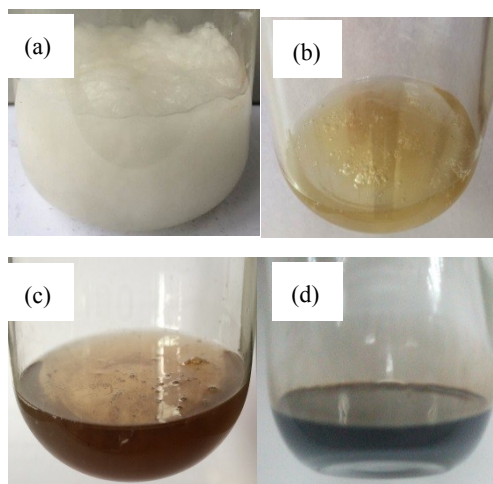

Fig.S1 The pre-carbonized process of PCM-Z: (a) After being stewed at 70°C for 24 h; (b) after heating at 65°C for 2 days; (c) after heating at 65°C for 4 days; (d) after heating at 65°C for 14 days

---

<sup>1\*</sup>Corresponding author 1

Junwei Wu, Ph.D, Associate professor, E-mail address: [junwei.wu@hitsz.edu.cn](mailto:junwei.wu@hitsz.edu.cn)

Phone: 86-755-2603 3290, Fax: 86-755-2603 3504

<sup>2\*</sup>Corresponding author 2

Zuohua Li, Ph.D, Associate professor, E-mail address: [lizuohua@hitsz.edu.cn](mailto:lizuohua@hitsz.edu.cn)

Phone: 86-755-2603 4949, Fax: 86-755-2603 3509

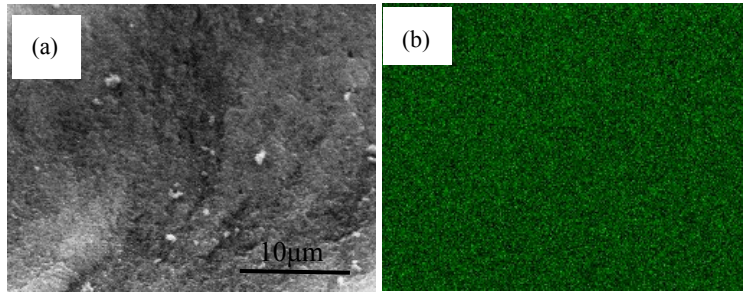

Fig. S2 (a) The SEM image of PCM-Z-S 58 wt% and EDX element mapping of (b) S (Green color dots)

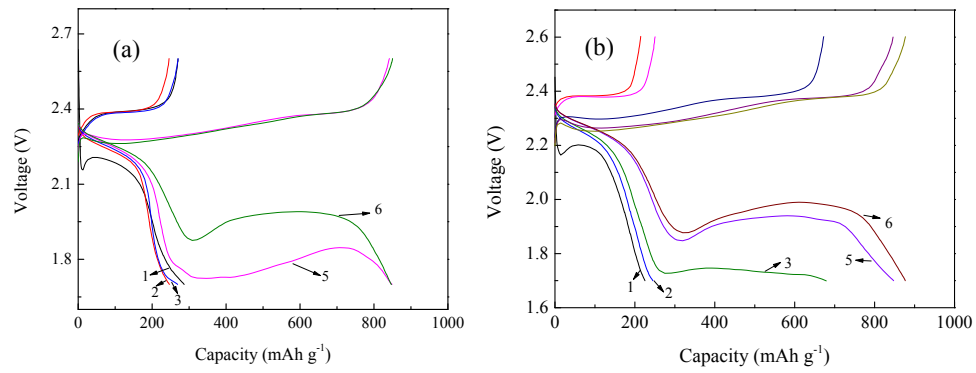

Fig. S3 The discharge-charge curves of PCM-Z-S 58 wt% composite with different deposited time at 1C: (a) 1 day and (b) 8 days

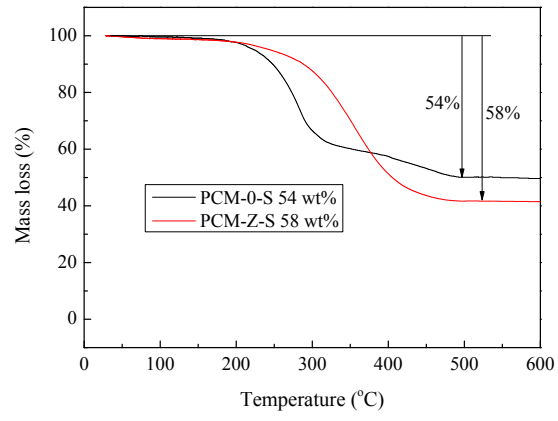

Fig. S4 The Tg analysis of PCM-0-S 54 wt% and PCM-Z-S 58 wt% composite

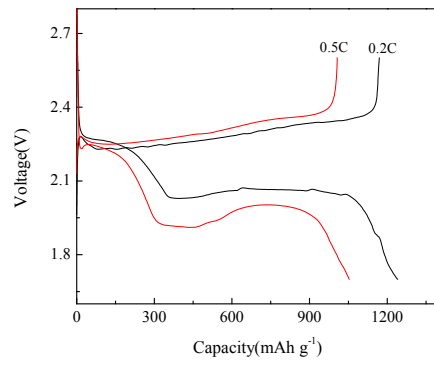

Fig. S5 The first discharge and charge curves, of PCM-Z-S 58 wt% at 0.2C and 0.5C

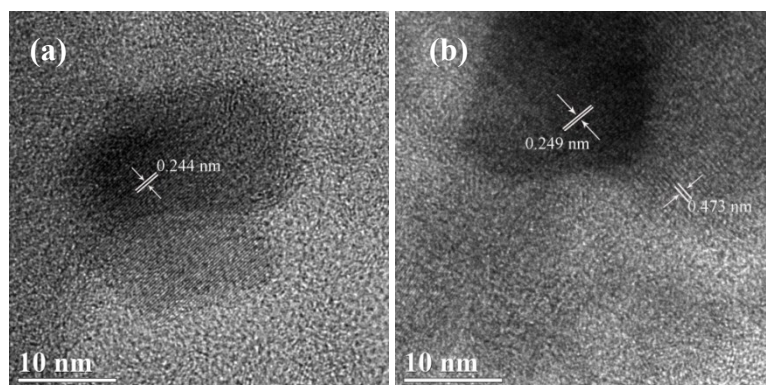

Fig. S6 High resolution images of (a) PCM-Z and (b) PCM-Z-S 58 wt% composite

Table S1 Calculated total surface area ( $\text{m}^2 \text{g}^{-1}$ ), total pore volume ( $\text{cm}^3 \text{g}^{-1}$ ), and average pore radius (nm) for PCM-0, PCM-0-S 54 wt%, PCM-Z and PCM-Z-S 58 wt%

| Materials      | Surface area | Pore volume | Average pore radius |
|----------------|--------------|-------------|---------------------|
| PCM-0          | 448          | 0.026       | 1.8                 |
| PCM-0-S 54 wt% | 35           | --          | --                  |
| PCM-Z          | 1056         | 1.75        | 1.8                 |
| PCM-Z-S 58 wt% | 153          | 0.50        | 4.75                |
